# Supplementary material
Source: publisher figshare collection journal article supplement (https://acs.figshare.com/ndownloader/files/3956422)
Supplement: Supplementary file 1 [file 3956422]

 
data_1
 
_audit_creation_method            SHELXL-97
_chemical_name_systematic
;
 ?
;
_chemical_name_common             ?
_chemical_melting_point           ?
_chemical_formula_moiety          'C42 H40 Co Cu2 N10 O4, H2 O'
_chemical_formula_sum
 'C42 H42 Co Cu2 N10 O5'
_chemical_formula_weight          952.89
 
loop_
 _atom_type_symbol
 _atom_type_description
 _atom_type_scat_dispersion_real
 _atom_type_scat_dispersion_imag
 _atom_type_scat_source
 'C'  'C'   0.0033   0.0016
 'International Tables Vol C Tables 4.2.6.8 and 6.1.1.4'
 'H'  'H'   0.0000   0.0000
 'International Tables Vol C Tables 4.2.6.8 and 6.1.1.4'
 'Co'  'Co'   0.3494   0.9721
 'International Tables Vol C Tables 4.2.6.8 and 6.1.1.4'
 'Cu'  'Cu'   0.3201   1.2651
 'International Tables Vol C Tables 4.2.6.8 and 6.1.1.4'
 'N'  'N'   0.0061   0.0033
 'International Tables Vol C Tables 4.2.6.8 and 6.1.1.4'
 'O'  'O'   0.0106   0.0060
 'International Tables Vol C Tables 4.2.6.8 and 6.1.1.4'
 
_symmetry_cell_setting            'Monoclinic'
_symmetry_space_group_name_H-M    'C 2/c'
 
loop_
 _symmetry_equiv_pos_as_xyz
 'x, y, z'
 '-x, y, -z+1/2'
 'x+1/2, y+1/2, z'
 '-x+1/2, y+1/2, -z+1/2'
 '-x, -y, -z'
 'x, -y, z-1/2'
 '-x+1/2, -y+1/2, -z'
 'x+1/2, -y+1/2, z-1/2'
 
_cell_length_a                    23.2919(9)
_cell_length_b                    10.4559(4)
_cell_length_c                    17.3059(7)
_cell_angle_alpha                 90.00
_cell_angle_beta                  97.357(2)
_cell_angle_gamma                 90.00
_cell_volume                      4179.9(3)
_cell_formula_units_Z             4
_cell_measurement_temperature     293(2)
_cell_measurement_reflns_used     ?
_cell_measurement_theta_min       1.76
_cell_measurement_theta_max       24.90
 
_exptl_crystal_description        RECTANGULAR
_exptl_crystal_colour             BROWN
_exptl_crystal_size_max           0.24
_exptl_crystal_size_mid           0.16
_exptl_crystal_size_min           0.08
_exptl_crystal_density_meas       ?
_exptl_crystal_density_diffrn     1.514
_exptl_crystal_density_method     'not measured'
_exptl_crystal_F_000              1956
_exptl_absorpt_coefficient_mu     1.458
_exptl_absorpt_correction_type    EMPIRICAL
_exptl_absorpt_correction_T_min   0.7210
_exptl_absorpt_correction_T_max   0.8923
_exptl_absorpt_process_details    SADABS
 
_exptl_special_details
;
 ?
;
 
_diffrn_ambient_temperature       293(2)
_diffrn_radiation_wavelength      0.71073
_diffrn_radiation_type            MoK\a
_diffrn_radiation_source          'fine-focus sealed tube'
_diffrn_radiation_monochromator   graphite
_diffrn_measurement_device_type   'CCD area detector'
_diffrn_measurement_method        'phi and omega scans'
_diffrn_detector_area_resol_mean  ?
_diffrn_standards_number          ?
_diffrn_standards_interval_count  ?
_diffrn_standards_interval_time   ?
_diffrn_standards_decay_%         ?
_diffrn_reflns_number             26229
_diffrn_reflns_av_R_equivalents   0.0530
_diffrn_reflns_av_sigmaI/netI     0.0359
_diffrn_reflns_limit_h_min        -27
_diffrn_reflns_limit_h_max        24
_diffrn_reflns_limit_k_min        -12
_diffrn_reflns_limit_k_max        12
_diffrn_reflns_limit_l_min        -20
_diffrn_reflns_limit_l_max        20
_diffrn_reflns_theta_min          1.76
_diffrn_reflns_theta_max          24.90
_reflns_number_total              3624
_reflns_number_gt                 2906
_reflns_threshold_expression      >2sigma(I)
 
_computing_data_collection        'Bruker SMART APEX2' 
_computing_cell_refinement        'Bruker SMART APEX2' 
_computing_data_reduction         'Bruker SAINT'
_computing_structure_solution     'SHELXS-97 (Sheldrick, 1990)' 
_computing_structure_refinement   'SHELXL-97 (Sheldrick, 1997)'
_computing_molecular_graphics     'Ortep-3 for Windows (Farrugia, 1997)'
_computing_publication_material   'WINGX V1.80.03'
 
_refine_special_details
;
 Refinement of F^2^ against ALL reflections.  The weighted R-factor wR and
 goodness of fit S are based on F^2^, conventional R-factors R are based
 on F, with F set to zero for negative F^2^. The threshold expression of
 F^2^ > 2sigma(F^2^) is used only for calculating R-factors(gt) etc. and is
 not relevant to the choice of reflections for refinement.  R-factors based
 on F^2^ are statistically about twice as large as those based on F, and R-
 factors based on ALL data will be even larger.
;
 
_refine_ls_structure_factor_coef  Fsqd
_refine_ls_matrix_type            full
_refine_ls_weighting_scheme       calc
_refine_ls_weighting_details
 'calc w=1/[\s^2^(Fo^2^)+(0.0562P)^2^+4.6496P] where P=(Fo^2^+2Fc^2^)/3'
_atom_sites_solution_primary      direct
_atom_sites_solution_secondary    difmap
_atom_sites_solution_hydrogens    geom
_refine_ls_hydrogen_treatment     noref
_refine_ls_extinction_method      none
_refine_ls_extinction_coef        ?
_refine_ls_number_reflns          3624
_refine_ls_number_parameters      278
_refine_ls_number_restraints      0
_refine_ls_R_factor_all           0.0521
_refine_ls_R_factor_gt            0.0392
_refine_ls_wR_factor_ref          0.1145
_refine_ls_wR_factor_gt           0.1016
_refine_ls_goodness_of_fit_ref    1.077
_refine_ls_restrained_S_all       1.077
_refine_ls_shift/su_max           0.001
_refine_ls_shift/su_mean          0.000
 
loop_
 _atom_site_label
 _atom_site_type_symbol
 _atom_site_fract_x
 _atom_site_fract_y
 _atom_site_fract_z
 _atom_site_U_iso_or_equiv
 _atom_site_adp_type
 _atom_site_occupancy
 _atom_site_symmetry_multiplicity
 _atom_site_calc_flag
 _atom_site_refinement_flags
 _atom_site_disorder_assembly
 _atom_site_disorder_group
Cu1 Cu 0.935376(19) 0.98493(4) 0.17595(2) 0.05300(17) Uani 1 1 d . . .
Co1 Co 1.0000 1.21332(6) 0.2500 0.04939(19) Uani 1 2 d S . .
O1 O 1.01390(10) 1.0377(2) 0.17724(13) 0.0554(6) Uani 1 1 d . . .
O2 O 0.92251(10) 1.1635(2) 0.19399(13) 0.0552(6) Uani 1 1 d . . .
N1 N 0.95344(15) 0.8198(3) 0.13329(18) 0.0647(8) Uani 1 1 d . . .
N2 N 0.85712(15) 0.9460(3) 0.20116(16) 0.0651(8) Uani 1 1 d . . .
N3 N 0.96887(15) 1.3502(3) 0.31955(17) 0.0653(8) Uani 1 1 d . . .
N4 N 0.89592(18) 1.4781(3) 0.3730(2) 0.0880(11) Uani 1 1 d . . .
N5 N 0.8237(3) 1.3960(5) 0.4479(4) 0.147(2) Uani 1 1 d . . .
C1 C 1.04707(16) 1.0068(3) 0.12277(17) 0.0501(8) Uani 1 1 d . . .
C2 C 1.09502(16) 1.0828(3) 0.11580(19) 0.0603(9) Uani 1 1 d . . .
H2 H 1.1032 1.1514 0.1496 0.072 Uiso 1 1 calc R . .
C3 C 1.13086(19) 1.0585(4) 0.0597(2) 0.0738(11) Uani 1 1 d . . .
H3 H 1.1628 1.1104 0.0555 0.089 Uiso 1 1 calc R . .
C4 C 1.1185(2) 0.9557(5) 0.0098(2) 0.0815(13) Uani 1 1 d . . .
H4 H 1.1418 0.9391 -0.0289 0.098 Uiso 1 1 calc R . .
C5 C 1.0725(2) 0.8793(4) 0.0171(2) 0.0767(12) Uani 1 1 d . . .
H5 H 1.0653 0.8105 -0.0168 0.092 Uiso 1 1 calc R . .
C6 C 0.99057(19) 0.8040(3) 0.0847(2) 0.0671(11) Uani 1 1 d . . .
C7 C 0.9907(3) 0.6812(5) 0.0379(3) 0.1098(18) Uani 1 1 d . . .
H8A H 0.9564 0.6329 0.0434 0.165 Uiso 1 1 calc R . .
H8B H 1.0243 0.6315 0.0568 0.165 Uiso 1 1 calc R . .
H8C H 0.9915 0.7015 -0.0160 0.165 Uiso 1 1 calc R . .
C9 C 0.9166(2) 0.7130(4) 0.1540(3) 0.0904(14) Uani 1 1 d . . .
H9A H 0.9376 0.6330 0.1528 0.109 Uiso 1 1 calc R . .
H9B H 0.8821 0.7076 0.1162 0.109 Uiso 1 1 calc R . .
C10 C 0.8997(2) 0.7334(4) 0.2337(3) 0.0957(16) Uani 1 1 d . . .
H10A H 0.8910 0.6510 0.2552 0.115 Uiso 1 1 calc R . .
H10B H 0.9326 0.7689 0.2668 0.115 Uiso 1 1 calc R . .
C11 C 0.8489(2) 0.8195(5) 0.2368(3) 0.0906(14) Uani 1 1 d . . .
H11A H 0.8146 0.7791 0.2097 0.109 Uiso 1 1 calc R . .
H11B H 0.8428 0.8314 0.2908 0.109 Uiso 1 1 calc R . .
C12 C 0.81508(19) 1.0274(5) 0.1969(2) 0.0700(11) Uani 1 1 d . . .
C13 C 0.7604(2) 0.9968(6) 0.2310(3) 0.116(2) Uani 1 1 d . . .
H13A H 0.7455 0.9158 0.2113 0.173 Uiso 1 1 calc R . .
H13B H 0.7321 1.0623 0.2167 0.173 Uiso 1 1 calc R . .
H13C H 0.7686 0.9926 0.2868 0.173 Uiso 1 1 calc R . .
C14 C 0.81967(16) 1.1542(4) 0.16255(18) 0.0608(9) Uani 1 1 d . . .
C15 C 0.77004(19) 1.2162(5) 0.1252(2) 0.0822(13) Uani 1 1 d . . .
H15 H 0.7346 1.1741 0.1214 0.099 Uiso 1 1 calc R . .
C16 C 0.7721(2) 1.3355(6) 0.0945(3) 0.0927(15) Uani 1 1 d . . .
H16 H 0.7389 1.3726 0.0683 0.111 Uiso 1 1 calc R . .
C17 C 0.8235(2) 1.4007(5) 0.1022(2) 0.0863(14) Uani 1 1 d . . .
H17 H 0.8246 1.4838 0.0834 0.104 Uiso 1 1 calc R . .
C18 C 0.87363(18) 1.3439(4) 0.1378(2) 0.0646(9) Uani 1 1 d . . .
H18 H 0.9083 1.3892 0.1431 0.078 Uiso 1 1 calc R . .
C19 C 0.87249(15) 1.2197(3) 0.16557(17) 0.0525(8) Uani 1 1 d . . .
C20 C 0.93377(18) 1.4054(3) 0.3450(2) 0.0594(9) Uani 1 1 d . . .
C21 C 0.8584(2) 1.4288(5) 0.4124(3) 0.0891(14) Uani 1 1 d . . .
C45 C 1.03531(16) 0.8991(3) 0.07340(17) 0.0580(9) Uani 1 1 d . . .
O1W O 0.7282(4) 1.2365(10) 0.4345(5) 0.149(4) Uani 0.50 1 d P . .
H1W1 H 0.7562 1.3098 0.4382 0.223 Uiso 0.50 1 d PR . .
H2W1 H 0.7412 1.1878 0.4832 0.223 Uiso 0.50 1 d PR . .
 
loop_
 _atom_site_aniso_label
 _atom_site_aniso_U_11
 _atom_site_aniso_U_22
 _atom_site_aniso_U_33
 _atom_site_aniso_U_23
 _atom_site_aniso_U_13
 _atom_site_aniso_U_12
Cu1 0.0614(3) 0.0393(2) 0.0575(3) 0.00126(16) 0.00460(19) -0.00548(18)
Co1 0.0545(4) 0.0406(3) 0.0537(3) 0.000 0.0095(3) 0.000
O1 0.0604(15) 0.0513(13) 0.0560(12) -0.0164(10) 0.0130(11) -0.0064(11)
O2 0.0569(14) 0.0410(12) 0.0667(13) 0.0034(10) 0.0036(11) 0.0022(11)
N1 0.080(2) 0.0385(15) 0.0696(18) -0.0031(13) -0.0117(17) 0.0000(15)
N2 0.075(2) 0.0643(19) 0.0555(16) 0.0071(14) 0.0051(15) -0.0259(18)
N3 0.080(2) 0.0505(17) 0.0681(18) -0.0048(14) 0.0184(16) 0.0032(16)
N4 0.095(3) 0.065(2) 0.111(3) 0.006(2) 0.036(2) 0.020(2)
N5 0.163(5) 0.126(4) 0.176(5) -0.005(4) 0.108(4) 0.010(4)
C1 0.062(2) 0.0458(18) 0.0426(16) 0.0004(13) 0.0055(14) 0.0157(16)
C2 0.071(3) 0.055(2) 0.0565(19) -0.0003(15) 0.0177(17) 0.0125(18)
C3 0.078(3) 0.080(3) 0.066(2) 0.013(2) 0.023(2) 0.023(2)
C4 0.090(3) 0.104(3) 0.052(2) -0.007(2) 0.017(2) 0.041(3)
C5 0.098(3) 0.077(3) 0.052(2) -0.0170(19) -0.001(2) 0.033(3)
C6 0.087(3) 0.046(2) 0.060(2) -0.0113(16) -0.026(2) 0.016(2)
C7 0.140(5) 0.069(3) 0.112(4) -0.045(3) -0.019(3) 0.016(3)
C9 0.104(4) 0.045(2) 0.114(4) -0.003(2) -0.014(3) -0.021(2)
C10 0.120(4) 0.065(3) 0.093(3) 0.029(2) -0.020(3) -0.037(3)
C11 0.104(4) 0.083(3) 0.083(3) 0.023(2) 0.003(2) -0.039(3)
C12 0.060(3) 0.094(3) 0.055(2) 0.000(2) 0.0080(17) -0.016(2)
C13 0.078(4) 0.161(6) 0.114(4) 0.022(4) 0.035(3) -0.025(3)
C14 0.056(2) 0.082(3) 0.0457(17) -0.0068(17) 0.0121(15) 0.0078(19)
C15 0.058(3) 0.117(4) 0.073(2) -0.022(3) 0.012(2) 0.017(2)
C16 0.090(4) 0.106(4) 0.078(3) -0.008(3) -0.002(2) 0.046(3)
C17 0.110(4) 0.074(3) 0.075(3) 0.006(2) 0.012(3) 0.040(3)
C18 0.075(3) 0.057(2) 0.063(2) 0.0014(17) 0.0115(18) 0.0157(19)
C19 0.056(2) 0.060(2) 0.0422(15) -0.0005(14) 0.0109(14) 0.0145(17)
C20 0.077(3) 0.0456(19) 0.0557(19) 0.0011(15) 0.0087(18) 0.0001(19)
C21 0.109(4) 0.078(3) 0.086(3) -0.003(2) 0.036(3) 0.021(3)
C45 0.071(2) 0.056(2) 0.0420(16) -0.0054(14) -0.0085(15) 0.0258(19)
O1W 0.117(7) 0.203(10) 0.120(6) 0.035(6) -0.006(5) -0.040(6)
 
_geom_special_details
;
 All esds (except the esd in the dihedral angle between two l.s. planes)
 are estimated using the full covariance matrix.  The cell esds are taken
 into account individually in the estimation of esds in distances, angles
 and torsion angles; correlations between esds in cell parameters are only
 used when they are defined by crystal symmetry.  An approximate (isotropic)
 treatment of cell esds is used for estimating esds involving l.s. planes.
;
 
loop_
 _geom_bond_atom_site_label_1
 _geom_bond_atom_site_label_2
 _geom_bond_distance
 _geom_bond_site_symmetry_2
 _geom_bond_publ_flag
Cu1 O1 1.908(2) . ?
Cu1 O2 1.922(2) . ?
Cu1 N1 1.945(3) . ?
Cu1 N2 1.970(3) . ?
Cu1 Co1 3.0193(6) . ?
Co1 O2 2.005(2) . ?
Co1 O2 2.005(2) 2_755 ?
Co1 N3 2.060(3) 2_755 ?
Co1 N3 2.060(3) . ?
Co1 O1 2.273(2) . ?
Co1 O1 2.273(2) 2_755 ?
Co1 Cu1 3.0193(6) 2_755 ?
O1 C1 1.333(4) . ?
O2 C19 1.341(4) . ?
N1 C6 1.292(5) . ?
N1 C9 1.480(5) . ?
N2 C12 1.292(5) . ?
N2 C11 1.483(5) . ?
N3 C20 1.135(5) . ?
N4 C21 1.283(6) . ?
N4 C20 1.304(5) . ?
N5 C21 1.130(6) . ?
C1 C2 1.388(5) . ?
C1 C45 1.419(5) . ?
C2 C3 1.383(5) . ?
C2 H2 0.9300 . ?
C3 C4 1.386(6) . ?
C3 H3 0.9300 . ?
C4 C5 1.356(6) . ?
C4 H4 0.9300 . ?
C5 C45 1.399(5) . ?
C5 H5 0.9300 . ?
C6 C45 1.472(6) . ?
C6 C7 1.519(5) . ?
C7 H8A 0.9600 . ?
C7 H8B 0.9600 . ?
C7 H8C 0.9600 . ?
C9 C10 1.498(7) . ?
C9 H9A 0.9700 . ?
C9 H9B 0.9700 . ?
C10 C11 1.492(7) . ?
C10 H10A 0.9700 . ?
C10 H10B 0.9700 . ?
C11 H11A 0.9700 . ?
C11 H11B 0.9700 . ?
C12 C14 1.462(6) . ?
C12 C13 1.506(6) . ?
C13 H13A 0.9600 . ?
C13 H13B 0.9600 . ?
C13 H13C 0.9600 . ?
C14 C19 1.403(5) . ?
C14 C15 1.409(5) . ?
C15 C16 1.359(7) . ?
C15 H15 0.9300 . ?
C16 C17 1.367(7) . ?
C16 H16 0.9300 . ?
C17 C18 1.384(6) . ?
C17 H17 0.9300 . ?
C18 C19 1.386(5) . ?
C18 H18 0.9300 . ?
O1W H1W1 1.0031 . ?
O1W H2W1 0.9980 . ?
 
loop_
 _geom_angle_atom_site_label_1
 _geom_angle_atom_site_label_2
 _geom_angle_atom_site_label_3
 _geom_angle
 _geom_angle_site_symmetry_1
 _geom_angle_site_symmetry_3
 _geom_angle_publ_flag
O1 Cu1 O2 83.47(10) . . ?
O1 Cu1 N1 90.44(12) . . ?
O2 Cu1 N1 165.81(12) . . ?
O1 Cu1 N2 165.89(11) . . ?
O2 Cu1 N2 89.82(12) . . ?
N1 Cu1 N2 98.73(14) . . ?
O1 Cu1 Co1 48.79(6) . . ?
O2 Cu1 Co1 40.77(7) . . ?
N1 Cu1 Co1 137.98(10) . . ?
N2 Cu1 Co1 119.63(10) . . ?
O2 Co1 O2 149.86(13) . 2_755 ?
O2 Co1 N3 105.10(11) . 2_755 ?
O2 Co1 N3 95.78(11) 2_755 2_755 ?
O2 Co1 N3 95.78(11) . . ?
O2 Co1 N3 105.10(11) 2_755 . ?
N3 Co1 N3 92.03(17) 2_755 . ?
O2 Co1 O1 72.87(9) . . ?
O2 Co1 O1 82.79(9) 2_755 . ?
N3 Co1 O1 98.72(10) 2_755 . ?
N3 Co1 O1 166.02(11) . . ?
O2 Co1 O1 82.79(9) . 2_755 ?
O2 Co1 O1 72.87(9) 2_755 2_755 ?
N3 Co1 O1 166.02(11) 2_755 2_755 ?
N3 Co1 O1 98.72(10) . 2_755 ?
O1 Co1 O1 72.24(12) . 2_755 ?
O2 Co1 Cu1 38.76(6) . . ?
O2 Co1 Cu1 111.62(6) 2_755 . ?
N3 Co1 Cu1 119.66(9) 2_755 . ?
N3 Co1 Cu1 127.13(9) . . ?
O1 Co1 Cu1 39.16(6) . . ?
O1 Co1 Cu1 59.84(6) 2_755 . ?
O2 Co1 Cu1 111.62(6) . 2_755 ?
O2 Co1 Cu1 38.76(6) 2_755 2_755 ?
N3 Co1 Cu1 127.13(9) 2_755 2_755 ?
N3 Co1 Cu1 119.66(9) . 2_755 ?
O1 Co1 Cu1 59.84(6) . 2_755 ?
O1 Co1 Cu1 39.16(6) 2_755 2_755 ?
Cu1 Co1 Cu1 75.46(2) . 2_755 ?
C1 O1 Cu1 124.3(2) . . ?
C1 O1 Co1 136.4(2) . . ?
Cu1 O1 Co1 92.06(9) . . ?
C19 O2 Cu1 120.8(2) . . ?
C19 O2 Co1 138.5(2) . . ?
Cu1 O2 Co1 100.47(10) . . ?
C6 N1 C9 121.2(3) . . ?
C6 N1 Cu1 123.8(3) . . ?
C9 N1 Cu1 114.7(3) . . ?
C12 N2 C11 118.3(4) . . ?
C12 N2 Cu1 124.5(3) . . ?
C11 N2 Cu1 116.7(3) . . ?
C20 N3 Co1 154.8(3) . . ?
C21 N4 C20 120.1(4) . . ?
O1 C1 C2 117.9(3) . . ?
O1 C1 C45 122.3(3) . . ?
C2 C1 C45 119.8(3) . . ?
C3 C2 C1 121.4(4) . . ?
C3 C2 H2 119.3 . . ?
C1 C2 H2 119.3 . . ?
C2 C3 C4 119.0(4) . . ?
C2 C3 H3 120.5 . . ?
C4 C3 H3 120.5 . . ?
C5 C4 C3 120.1(4) . . ?
C5 C4 H4 119.9 . . ?
C3 C4 H4 119.9 . . ?
C4 C5 C45 123.1(4) . . ?
C4 C5 H5 118.5 . . ?
C45 C5 H5 118.5 . . ?
N1 C6 C45 123.0(3) . . ?
N1 C6 C7 120.2(4) . . ?
C45 C6 C7 116.8(4) . . ?
C6 C7 H8A 109.5 . . ?
C6 C7 H8B 109.5 . . ?
H8A C7 H8B 109.5 . . ?
C6 C7 H8C 109.5 . . ?
H8A C7 H8C 109.5 . . ?
H8B C7 H8C 109.5 . . ?
N1 C9 C10 110.1(3) . . ?
N1 C9 H9A 109.6 . . ?
C10 C9 H9A 109.6 . . ?
N1 C9 H9B 109.6 . . ?
C10 C9 H9B 109.6 . . ?
H9A C9 H9B 108.1 . . ?
C11 C10 C9 115.0(4) . . ?
C11 C10 H10A 108.5 . . ?
C9 C10 H10A 108.5 . . ?
C11 C10 H10B 108.5 . . ?
C9 C10 H10B 108.5 . . ?
H10A C10 H10B 107.5 . . ?
N2 C11 C10 112.2(4) . . ?
N2 C11 H11A 109.2 . . ?
C10 C11 H11A 109.2 . . ?
N2 C11 H11B 109.2 . . ?
C10 C11 H11B 109.2 . . ?
H11A C11 H11B 107.9 . . ?
N2 C12 C14 121.7(3) . . ?
N2 C12 C13 120.7(4) . . ?
C14 C12 C13 117.5(4) . . ?
C12 C13 H13A 109.5 . . ?
C12 C13 H13B 109.5 . . ?
H13A C13 H13B 109.5 . . ?
C12 C13 H13C 109.5 . . ?
H13A C13 H13C 109.5 . . ?
H13B C13 H13C 109.5 . . ?
C19 C14 C15 117.1(4) . . ?
C19 C14 C12 122.5(3) . . ?
C15 C14 C12 120.4(4) . . ?
C16 C15 C14 122.3(5) . . ?
C16 C15 H15 118.9 . . ?
C14 C15 H15 118.9 . . ?
C15 C16 C17 119.6(4) . . ?
C15 C16 H16 120.2 . . ?
C17 C16 H16 120.2 . . ?
C16 C17 C18 120.5(4) . . ?
C16 C17 H17 119.8 . . ?
C18 C17 H17 119.8 . . ?
C17 C18 C19 120.3(4) . . ?
C17 C18 H18 119.9 . . ?
C19 C18 H18 119.9 . . ?
O2 C19 C18 118.9(3) . . ?
O2 C19 C14 121.1(3) . . ?
C18 C19 C14 120.0(3) . . ?
N3 C20 N4 174.9(4) . . ?
N5 C21 N4 173.9(6) . . ?
C5 C45 C1 116.6(4) . . ?
C5 C45 C6 120.3(3) . . ?
C1 C45 C6 122.8(3) . . ?
H1W1 O1W H2W1 102.2 . . ?
 
loop_
 _geom_torsion_atom_site_label_1
 _geom_torsion_atom_site_label_2
 _geom_torsion_atom_site_label_3
 _geom_torsion_atom_site_label_4
 _geom_torsion
 _geom_torsion_site_symmetry_1
 _geom_torsion_site_symmetry_2
 _geom_torsion_site_symmetry_3
 _geom_torsion_site_symmetry_4
 _geom_torsion_publ_flag
O1 Cu1 Co1 O2 141.65(14) . . . . ?
N1 Cu1 Co1 O2 158.55(17) . . . . ?
N2 Cu1 Co1 O2 -48.30(15) . . . . ?
O1 Cu1 Co1 O2 -45.53(12) . . . 2_755 ?
O2 Cu1 Co1 O2 172.82(5) . . . 2_755 ?
N1 Cu1 Co1 O2 -28.63(15) . . . 2_755 ?
N2 Cu1 Co1 O2 124.52(13) . . . 2_755 ?
O1 Cu1 Co1 N3 64.98(14) . . . 2_755 ?
O2 Cu1 Co1 N3 -76.67(14) . . . 2_755 ?
N1 Cu1 Co1 N3 81.88(17) . . . 2_755 ?
N2 Cu1 Co1 N3 -124.97(15) . . . 2_755 ?
O1 Cu1 Co1 N3 -176.19(15) . . . . ?
O2 Cu1 Co1 N3 42.16(15) . . . . ?
N1 Cu1 Co1 N3 -159.29(17) . . . . ?
N2 Cu1 Co1 N3 -6.14(15) . . . . ?
O2 Cu1 Co1 O1 -141.65(14) . . . . ?
N1 Cu1 Co1 O1 16.90(17) . . . . ?
N2 Cu1 Co1 O1 170.06(14) . . . . ?
O1 Cu1 Co1 O1 -98.89(13) . . . 2_755 ?
O2 Cu1 Co1 O1 119.46(12) . . . 2_755 ?
N1 Cu1 Co1 O1 -81.99(16) . . . 2_755 ?
N2 Cu1 Co1 O1 71.16(13) . . . 2_755 ?
O1 Cu1 Co1 Cu1 -59.77(10) . . . 2_755 ?
O2 Cu1 Co1 Cu1 158.58(10) . . . 2_755 ?
N1 Cu1 Co1 Cu1 -42.87(14) . . . 2_755 ?
N2 Cu1 Co1 Cu1 110.29(11) . . . 2_755 ?
O2 Cu1 O1 C1 -130.3(2) . . . . ?
N1 Cu1 O1 C1 36.8(3) . . . . ?
N2 Cu1 O1 C1 167.6(5) . . . . ?
Co1 Cu1 O1 C1 -154.4(3) . . . . ?
O2 Cu1 O1 Co1 24.07(9) . . . . ?
N1 Cu1 O1 Co1 -168.78(11) . . . . ?
N2 Cu1 O1 Co1 -38.0(5) . . . . ?
O2 Co1 O1 C1 124.8(3) . . . . ?
O2 Co1 O1 C1 -73.2(3) 2_755 . . . ?
N3 Co1 O1 C1 21.6(3) 2_755 . . . ?
N3 Co1 O1 C1 161.4(4) . . . . ?
O1 Co1 O1 C1 -147.5(4) 2_755 . . . ?
Cu1 Co1 O1 C1 148.8(4) . . . . ?
Cu1 Co1 O1 C1 -106.5(3) 2_755 . . . ?
O2 Co1 O1 Cu1 -23.99(9) . . . . ?
O2 Co1 O1 Cu1 138.03(11) 2_755 . . . ?
N3 Co1 O1 Cu1 -127.19(12) 2_755 . . . ?
N3 Co1 O1 Cu1 12.7(5) . . . . ?
O1 Co1 O1 Cu1 63.77(8) 2_755 . . . ?
Cu1 Co1 O1 Cu1 104.70(9) 2_755 . . . ?
O1 Cu1 O2 C19 147.8(2) . . . . ?
N1 Cu1 O2 C19 82.7(5) . . . . ?
N2 Cu1 O2 C19 -44.6(2) . . . . ?
Co1 Cu1 O2 C19 175.9(3) . . . . ?
O1 Cu1 O2 Co1 -28.02(10) . . . . ?
N1 Cu1 O2 Co1 -93.1(5) . . . . ?
N2 Cu1 O2 Co1 139.54(11) . . . . ?
O2 Co1 O2 C19 172.0(3) 2_755 . . . ?
N3 Co1 O2 C19 -55.8(3) 2_755 . . . ?
N3 Co1 O2 C19 37.9(3) . . . . ?
O1 Co1 O2 C19 -150.4(3) . . . . ?
O1 Co1 O2 C19 136.0(3) 2_755 . . . ?
Cu1 Co1 O2 C19 -174.6(3) . . . . ?
Cu1 Co1 O2 C19 163.0(3) 2_755 . . . ?
O2 Co1 O2 Cu1 -13.38(6) 2_755 . . . ?
N3 Co1 O2 Cu1 118.86(11) 2_755 . . . ?
N3 Co1 O2 Cu1 -147.46(12) . . . . ?
O1 Co1 O2 Cu1 24.21(9) . . . . ?
O1 Co1 O2 Cu1 -49.36(9) 2_755 . . . ?
Cu1 Co1 O2 Cu1 -22.35(11) 2_755 . . . ?
O1 Cu1 N1 C6 -35.1(3) . . . . ?
O2 Cu1 N1 C6 29.3(6) . . . . ?
N2 Cu1 N1 C6 155.7(3) . . . . ?
Co1 Cu1 N1 C6 -47.7(3) . . . . ?
O1 Cu1 N1 C9 151.3(3) . . . . ?
O2 Cu1 N1 C9 -144.4(4) . . . . ?
N2 Cu1 N1 C9 -17.9(3) . . . . ?
Co1 Cu1 N1 C9 138.7(2) . . . . ?
O1 Cu1 N2 C12 83.9(6) . . . . ?
O2 Cu1 N2 C12 22.5(3) . . . . ?
N1 Cu1 N2 C12 -146.2(3) . . . . ?
Co1 Cu1 N2 C12 51.7(3) . . . . ?
O1 Cu1 N2 C11 -88.0(6) . . . . ?
O2 Cu1 N2 C11 -149.4(3) . . . . ?
N1 Cu1 N2 C11 42.0(3) . . . . ?
Co1 Cu1 N2 C11 -120.2(3) . . . . ?
O2 Co1 N3 C20 7.5(7) . . . . ?
O2 Co1 N3 C20 -150.5(7) 2_755 . . . ?
N3 Co1 N3 C20 112.9(7) 2_755 . . . ?
O1 Co1 N3 C20 -27.4(10) . . . . ?
O1 Co1 N3 C20 -76.0(7) 2_755 . . . ?
Cu1 Co1 N3 C20 -17.4(7) . . . . ?
Cu1 Co1 N3 C20 -111.4(7) 2_755 . . . ?
Cu1 O1 C1 C2 159.0(2) . . . . ?
Co1 O1 C1 C2 17.8(5) . . . . ?
Cu1 O1 C1 C45 -22.0(4) . . . . ?
Co1 O1 C1 C45 -163.1(2) . . . . ?
O1 C1 C2 C3 -178.6(3) . . . . ?
C45 C1 C2 C3 2.2(5) . . . . ?
C1 C2 C3 C4 -0.3(6) . . . . ?
C2 C3 C4 C5 -1.1(6) . . . . ?
C3 C4 C5 C45 0.5(6) . . . . ?
C9 N1 C6 C45 -168.2(3) . . . . ?
Cu1 N1 C6 C45 18.5(5) . . . . ?
C9 N1 C6 C7 9.7(5) . . . . ?
Cu1 N1 C6 C7 -163.5(3) . . . . ?
C6 N1 C9 C10 153.2(4) . . . . ?
Cu1 N1 C9 C10 -33.0(5) . . . . ?
N1 C9 C10 C11 82.9(5) . . . . ?
C12 N2 C11 C10 176.8(4) . . . . ?
Cu1 N2 C11 C10 -10.8(5) . . . . ?
C9 C10 C11 N2 -55.2(5) . . . . ?
C11 N2 C12 C14 -180.0(3) . . . . ?
Cu1 N2 C12 C14 8.3(5) . . . . ?
C11 N2 C12 C13 3.0(6) . . . . ?
Cu1 N2 C12 C13 -168.7(3) . . . . ?
N2 C12 C14 C19 -30.7(5) . . . . ?
C13 C12 C14 C19 146.4(4) . . . . ?
N2 C12 C14 C15 149.9(4) . . . . ?
C13 C12 C14 C15 -33.0(5) . . . . ?
C19 C14 C15 C16 -1.4(5) . . . . ?
C12 C14 C15 C16 178.1(4) . . . . ?
C14 C15 C16 C17 -2.5(6) . . . . ?
C15 C16 C17 C18 3.0(6) . . . . ?
C16 C17 C18 C19 0.5(6) . . . . ?
Cu1 O2 C19 C18 -142.4(2) . . . . ?
Co1 O2 C19 C18 31.5(4) . . . . ?
Cu1 O2 C19 C14 36.6(4) . . . . ?
Co1 O2 C19 C14 -149.5(3) . . . . ?
C17 C18 C19 O2 174.6(3) . . . . ?
C17 C18 C19 C14 -4.4(5) . . . . ?
C15 C14 C19 O2 -174.2(3) . . . . ?
C12 C14 C19 O2 6.4(5) . . . . ?
C15 C14 C19 C18 4.8(5) . . . . ?
C12 C14 C19 C18 -174.6(3) . . . . ?
Co1 N3 C20 N4 -134(5) . . . . ?
C21 N4 C20 N3 -167(5) . . . . ?
C20 N4 C21 N5 179(100) . . . . ?
C4 C5 C45 C1 1.4(5) . . . . ?
C4 C5 C45 C6 -172.4(4) . . . . ?
O1 C1 C45 C5 178.2(3) . . . . ?
C2 C1 C45 C5 -2.7(5) . . . . ?
O1 C1 C45 C6 -8.1(5) . . . . ?
C2 C1 C45 C6 170.9(3) . . . . ?
N1 C6 C45 C5 -176.9(3) . . . . ?
C7 C6 C45 C5 5.1(5) . . . . ?
N1 C6 C45 C1 9.7(5) . . . . ?
C7 C6 C45 C1 -168.3(3) . . . . ?
 
_diffrn_measured_fraction_theta_max    0.995
_diffrn_reflns_theta_full              24.90
_diffrn_measured_fraction_theta_full   0.995
_refine_diff_density_max    0.616
_refine_diff_density_min   -0.623
_refine_diff_density_rms    0.063
 
 
data_2a
 
_audit_creation_method            SHELXL-97
_chemical_name_systematic
;
 ?
;
_chemical_name_common             ?
_chemical_melting_point           ?
_chemical_formula_moiety          ?
_chemical_formula_sum
 'C38 H32 Co Cu2 N10 O4'
_chemical_formula_weight          878.77
 
loop_
 _atom_type_symbol
 _atom_type_description
 _atom_type_scat_dispersion_real
 _atom_type_scat_dispersion_imag
 _atom_type_scat_source
 'C'  'C'   0.0033   0.0016
 'International Tables Vol C Tables 4.2.6.8 and 6.1.1.4'
 'H'  'H'   0.0000   0.0000
 'International Tables Vol C Tables 4.2.6.8 and 6.1.1.4'
 'N'  'N'   0.0061   0.0033
 'International Tables Vol C Tables 4.2.6.8 and 6.1.1.4'
 'O'  'O'   0.0106   0.0060
 'International Tables Vol C Tables 4.2.6.8 and 6.1.1.4'
 'Co'  'Co'   0.3494   0.9721
 'International Tables Vol C Tables 4.2.6.8 and 6.1.1.4'
 'Cu'  'Cu'   0.3201   1.2651
 'International Tables Vol C Tables 4.2.6.8 and 6.1.1.4'
 
_symmetry_cell_setting            'Monoclinic'
_symmetry_space_group_name_H-M    'P 21/c'
 
loop_
 _symmetry_equiv_pos_as_xyz
 'x, y, z'
 '-x, y+1/2, -z+1/2'
 '-x, -y, -z'
 'x, -y-1/2, z-1/2'
 
_cell_length_a                    16.314(5)
_cell_length_b                    10.792(5)
_cell_length_c                    21.913(5)
_cell_angle_alpha                 90.000(5)
_cell_angle_beta                  106.668(5)
_cell_angle_gamma                 90.000(5)
_cell_volume                      3696(2)
_cell_formula_units_Z             4
_cell_measurement_temperature     293(2)
_cell_measurement_reflns_used     ?
_cell_measurement_theta_min       1.30
_cell_measurement_theta_max       25.50
 
_exptl_crystal_description        rectangular
_exptl_crystal_colour             brown
_exptl_crystal_size_max           0.16
_exptl_crystal_size_mid           0.08
_exptl_crystal_size_min           0.04
_exptl_crystal_density_meas       ?
_exptl_crystal_density_diffrn     1.579
_exptl_crystal_density_method     'not measured'
_exptl_crystal_F_000              1740
_exptl_absorpt_coefficient_mu     1.637
_exptl_absorpt_correction_type    empirical
_exptl_absorpt_correction_T_min   0.7796
_exptl_absorpt_correction_T_max   0.9374
_exptl_absorpt_process_details    sadabs
 
_exptl_special_details
;
 ?
;
 
_diffrn_ambient_temperature       293(2)
_diffrn_radiation_wavelength      0.71073
_diffrn_radiation_type            MoK\a
_diffrn_radiation_source          'fine-focus sealed tube'
_diffrn_radiation_monochromator   graphite
_diffrn_measurement_device_type   'CCD area detector'
_diffrn_measurement_method        'phi and omega scans'
_diffrn_detector_area_resol_mean  ?
_diffrn_standards_number          ?
_diffrn_standards_interval_count  ?
_diffrn_standards_interval_time   ?
_diffrn_standards_decay_%         ?
_diffrn_reflns_number             25521
_diffrn_reflns_av_R_equivalents   0.0516
_diffrn_reflns_av_sigmaI/netI     0.0513
_diffrn_reflns_limit_h_min        -19
_diffrn_reflns_limit_h_max        19
_diffrn_reflns_limit_k_min        -12
_diffrn_reflns_limit_k_max        13
_diffrn_reflns_limit_l_min        -26
_diffrn_reflns_limit_l_max        26
_diffrn_reflns_theta_min          1.30
_diffrn_reflns_theta_max          25.50
_reflns_number_total              6747
_reflns_number_gt                 4843
_reflns_threshold_expression      >2sigma(I)
 
_computing_data_collection        'Bruker SMART APEX2' 
_computing_cell_refinement        'Bruker SMART APEX2' 
_computing_data_reduction         'Bruker SAINT'
_computing_structure_solution     'SHELXS-97 (Sheldrick, 1990)' 
_computing_structure_refinement   'SHELXL-97 (Sheldrick, 1997)'
_computing_molecular_graphics     'Ortep-3 for Windows (Farrugia, 1997)'
_computing_publication_material   'WINGX V1.80.03'
 
_refine_special_details
;
 Refinement of F^2^ against ALL reflections.  The weighted R-factor wR and
 goodness of fit S are based on F^2^, conventional R-factors R are based
 on F, with F set to zero for negative F^2^. The threshold expression of
 F^2^ > 2sigma(F^2^) is used only for calculating R-factors(gt) etc. and is
 not relevant to the choice of reflections for refinement.  R-factors based
 on F^2^ are statistically about twice as large as those based on F, and R-
 factors based on ALL data will be even larger.
;
 
_refine_ls_structure_factor_coef  Fsqd
_refine_ls_matrix_type            full
_refine_ls_weighting_scheme       calc
_refine_ls_weighting_details
 'calc w=1/[\s^2^(Fo^2^)+(0.0369P)^2^+0.8773P] where P=(Fo^2^+2Fc^2^)/3'
_atom_sites_solution_primary      direct
_atom_sites_solution_secondary    difmap
_atom_sites_solution_hydrogens    geom
_refine_ls_hydrogen_treatment     noref
_refine_ls_extinction_method      none
_refine_ls_extinction_coef        ?
_refine_ls_number_reflns          6747
_refine_ls_number_parameters      496
_refine_ls_number_restraints      0
_refine_ls_R_factor_all           0.0628
_refine_ls_R_factor_gt            0.0375
_refine_ls_wR_factor_ref          0.0906
_refine_ls_wR_factor_gt           0.0812
_refine_ls_goodness_of_fit_ref    1.023
_refine_ls_restrained_S_all       1.023
_refine_ls_shift/su_max           0.001
_refine_ls_shift/su_mean          0.000
 
loop_
 _atom_site_label
 _atom_site_type_symbol
 _atom_site_fract_x
 _atom_site_fract_y
 _atom_site_fract_z
 _atom_site_U_iso_or_equiv
 _atom_site_adp_type
 _atom_site_occupancy
 _atom_site_symmetry_multiplicity
 _atom_site_calc_flag
 _atom_site_refinement_flags
 _atom_site_disorder_assembly
 _atom_site_disorder_group
Co1 Co 0.25871(3) -0.12915(4) 0.24870(2) 0.03149(12) Uani 1 1 d . . .
Cu1B Cu 0.17912(3) 0.11644(3) 0.186780(19) 0.03578(12) Uani 1 1 d . . .
Cu1A Cu 0.37074(3) 0.04669(4) 0.34516(2) 0.04144(13) Uani 1 1 d . . .
N1A N 0.3595(2) 0.0734(3) 0.43167(15) 0.0569(9) Uani 1 1 d . . .
O2A O 0.35862(14) 0.0015(2) 0.25687(10) 0.0408(6) Uani 1 1 d . . .
O1A O 0.33307(14) -0.1256(2) 0.34403(10) 0.0395(6) Uani 1 1 d . . .
O1B O 0.19698(14) -0.05260(18) 0.16175(10) 0.0353(5) Uani 1 1 d . . .
O2B O 0.19786(14) 0.03805(19) 0.26977(10) 0.0391(6) Uani 1 1 d . . .
N2B N 0.17913(19) 0.2814(2) 0.22611(14) 0.0447(7) Uani 1 1 d . . .
N7B N 0.16351(19) -0.2472(3) 0.25750(14) 0.0466(8) Uani 1 1 d . . .
N7A N 0.31886(18) -0.2749(3) 0.21668(14) 0.0444(7) Uani 1 1 d . . .
C6B C 0.1346(2) -0.0212(3) 0.05046(16) 0.0408(8) Uani 1 1 d . . .
N1B N 0.18281(19) 0.1771(3) 0.10252(14) 0.0442(7) Uani 1 1 d . . .
C2B C 0.1416(2) -0.2246(3) 0.09588(16) 0.0442(9) Uani 1 1 d . . .
H2B H 0.1572 -0.2776 0.1308 0.053 Uiso 1 1 calc R . .
C6A C 0.3333(2) -0.1451(4) 0.45271(17) 0.0495(10) Uani 1 1 d . . .
N2A N 0.39277(19) 0.2210(3) 0.32648(15) 0.0498(8) Uani 1 1 d . . .
C17A C 0.3935(2) 0.0554(3) 0.21637(16) 0.0374(8) Uani 1 1 d . . .
C16A C 0.3961(2) -0.0050(3) 0.16075(17) 0.0469(9) Uani 1 1 d . . .
H16A H 0.3713 -0.0829 0.1513 0.056 Uiso 1 1 calc R . .
C1A C 0.3264(2) -0.1957(3) 0.39249(16) 0.0421(9) Uani 1 1 d . . .
C1B C 0.1583(2) -0.0985(3) 0.10462(15) 0.0354(8) Uani 1 1 d . . .
C36B C 0.1225(2) -0.3206(3) 0.27216(18) 0.0442(9) Uani 1 1 d . . .
C7B C 0.1558(2) 0.1079(3) 0.05294(18) 0.0502(10) Uani 1 1 d . . .
H7B H 0.1492 0.1465 0.0139 0.060 Uiso 1 1 calc R . .
C12B C 0.1333(2) 0.1976(3) 0.31466(16) 0.0442(9) Uani 1 1 d . . .
C15B C 0.1006(3) 0.0269(4) 0.39919(19) 0.0637(12) Uani 1 1 d . . .
H15B H 0.0899 -0.0308 0.4275 0.076 Uiso 1 1 calc R . .
C13A C 0.4695(2) 0.2267(4) 0.1853(2) 0.0589(11) Uani 1 1 d . . .
H13A H 0.4947 0.3045 0.1937 0.071 Uiso 1 1 calc R . .
C7A C 0.3473(3) -0.0154(4) 0.46712(18) 0.0624(12) Uani 1 1 d . . .
H7A H 0.3476 0.0075 0.5081 0.075 Uiso 1 1 calc R . .
C3B C 0.1025(3) -0.2721(4) 0.03670(17) 0.0552(10) Uani 1 1 d . . .
H3B H 0.0928 -0.3570 0.0321 0.066 Uiso 1 1 calc R . .
C17B C 0.1580(2) 0.0738(3) 0.31173(16) 0.0378(8) Uani 1 1 d . . .
C12A C 0.4295(2) 0.1752(3) 0.22820(16) 0.0421(9) Uani 1 1 d . . .
C4B C 0.0774(3) -0.1967(4) -0.01613(18) 0.0602(11) Uani 1 1 d . . .
H4B H 0.0494 -0.2297 -0.0558 0.072 Uiso 1 1 calc R . .
C5B C 0.0940(3) -0.0732(4) -0.00932(17) 0.0554(10) Uani 1 1 d . . .
H5B H 0.0782 -0.0221 -0.0450 0.066 Uiso 1 1 calc R . .
C16B C 0.1412(2) -0.0102(4) 0.35491(16) 0.0489(9) Uani 1 1 d . . .
H16B H 0.1576 -0.0925 0.3539 0.059 Uiso 1 1 calc R . .
C11A C 0.4215(2) 0.2517(3) 0.27989(19) 0.0531(10) Uani 1 1 d . . .
H11A H 0.4392 0.3335 0.2795 0.064 Uiso 1 1 calc R . .
C14B C 0.0758(3) 0.1487(4) 0.4019(2) 0.0740(14) Uani 1 1 d . . .
H14B H 0.0483 0.1729 0.4317 0.089 Uiso 1 1 calc R . .
C2A C 0.3113(2) -0.3219(3) 0.38369(18) 0.0514(10) Uani 1 1 d . . .
H2A H 0.3088 -0.3578 0.3446 0.062 Uiso 1 1 calc R . .
C5A C 0.3219(3) -0.2223(5) 0.50102(19) 0.0690(13) Uani 1 1 d . . .
H5A H 0.3261 -0.1885 0.5409 0.083 Uiso 1 1 calc R . .
C10B C 0.2005(3) 0.3954(3) 0.1977(2) 0.0651(12) Uani 1 1 d . . .
H10D H 0.2622 0.4043 0.2095 0.078 Uiso 1 1 calc R . .
H10C H 0.1777 0.4657 0.2152 0.078 Uiso 1 1 calc R . .
C15A C 0.4350(2) 0.0500(4) 0.11979(18) 0.0577(11) Uani 1 1 d . . .
H15A H 0.4363 0.0081 0.0830 0.069 Uiso 1 1 calc R . .
C4A C 0.3051(3) -0.3447(5) 0.4912(2) 0.0742(14) Uani 1 1 d . . .
H4A H 0.2971 -0.3942 0.5238 0.089 Uiso 1 1 calc R . .
C10A C 0.3860(3) 0.3229(4) 0.3691(2) 0.0731(13) Uani 1 1 d . . .
H10A H 0.3264 0.3467 0.3606 0.088 Uiso 1 1 calc R . .
H10B H 0.4173 0.3941 0.3606 0.088 Uiso 1 1 calc R . .
C14A C 0.4719(3) 0.1649(4) 0.1317(2) 0.0685(13) Uani 1 1 d . . .
H14A H 0.4984 0.2001 0.1035 0.082 Uiso 1 1 calc R . .
C11B C 0.1516(2) 0.2944(3) 0.27468(18) 0.0525(10) Uani 1 1 d . . .
H11B H 0.1422 0.3753 0.2857 0.063 Uiso 1 1 calc R . .
C9B C 0.1659(3) 0.3979(3) 0.1262(2) 0.0656(12) Uani 1 1 d . . .
H9C H 0.1048 0.3819 0.1144 0.079 Uiso 1 1 calc R . .
H9D H 0.1741 0.4802 0.1111 0.079 Uiso 1 1 calc R . .
C8B C 0.2075(3) 0.3049(3) 0.09360(19) 0.0632(12) Uani 1 1 d . . .
H8C H 0.1918 0.3233 0.0484 0.076 Uiso 1 1 calc R . .
H8D H 0.2691 0.3127 0.1101 0.076 Uiso 1 1 calc R . .
C13B C 0.0921(3) 0.2334(4) 0.36036(19) 0.0658(12) Uani 1 1 d . . .
H13B H 0.0758 0.3156 0.3623 0.079 Uiso 1 1 calc R . .
C3A C 0.2998(3) -0.3951(4) 0.4325(2) 0.0683(13) Uani 1 1 d . . .
H3A H 0.2885 -0.4791 0.4256 0.082 Uiso 1 1 calc R . .
C9A C 0.4203(3) 0.2873(4) 0.4372(2) 0.0825(15) Uani 1 1 d . . .
H9A H 0.4759 0.2488 0.4434 0.099 Uiso 1 1 calc R . .
H9B H 0.4287 0.3617 0.4630 0.099 Uiso 1 1 calc R . .
C8A C 0.3648(4) 0.2013(5) 0.4598(2) 0.0954(18) Uani 1 1 d . . .
H8A H 0.3077 0.2360 0.4496 0.114 Uiso 1 1 calc R . .
H8B H 0.3862 0.1949 0.5058 0.114 Uiso 1 1 calc R . .
C35B C 0.0204(2) -0.4021(3) 0.31303(17) 0.0430(9) Uani 1 1 d . . .
C36A C 0.3452(2) -0.3571(3) 0.19609(18) 0.0454(9) Uani 1 1 d . . .
N6B N 0.0821(2) -0.4139(3) 0.2868(2) 0.0775(12) Uani 1 1 d . . .
N6A N 0.3687(2) -0.4595(3) 0.1746(2) 0.0861(13) Uani 1 1 d . . .
N5B N -0.0333(2) -0.4046(3) 0.33690(15) 0.0531(8) Uani 1 1 d . . .
N5A N 0.4786(2) -0.4848(3) 0.12097(15) 0.0540(8) Uani 1 1 d . . .
C35A C 0.4282(2) -0.4661(3) 0.14631(18) 0.0431(9) Uani 1 1 d . . .
 
loop_
 _atom_site_aniso_label
 _atom_site_aniso_U_11
 _atom_site_aniso_U_22
 _atom_site_aniso_U_33
 _atom_site_aniso_U_23
 _atom_site_aniso_U_13
 _atom_site_aniso_U_12
Co1 0.0357(3) 0.0287(2) 0.0317(3) 0.00084(19) 0.0121(2) -0.00085(19)
Cu1B 0.0428(3) 0.0293(2) 0.0379(3) 0.00197(18) 0.0159(2) 0.00342(18)
Cu1A 0.0441(3) 0.0429(3) 0.0394(3) -0.0081(2) 0.0151(2) -0.0077(2)
N1A 0.061(2) 0.069(2) 0.045(2) -0.0230(18) 0.0219(17) -0.0157(18)
O2A 0.0462(14) 0.0423(13) 0.0363(13) -0.0048(11) 0.0155(11) -0.0140(11)
O1A 0.0477(14) 0.0415(14) 0.0313(13) 0.0030(11) 0.0147(11) -0.0032(11)
O1B 0.0415(13) 0.0335(13) 0.0285(13) -0.0004(10) 0.0064(10) 0.0039(10)
O2B 0.0502(15) 0.0349(13) 0.0372(13) 0.0028(10) 0.0202(12) 0.0072(11)
N2B 0.0526(19) 0.0294(16) 0.056(2) 0.0005(14) 0.0212(16) 0.0008(14)
N7B 0.0484(19) 0.0417(18) 0.055(2) -0.0001(15) 0.0237(16) -0.0093(15)
N7A 0.0461(19) 0.0388(17) 0.0505(19) -0.0052(15) 0.0176(15) 0.0023(14)
C6B 0.045(2) 0.044(2) 0.033(2) 0.0018(17) 0.0105(17) 0.0089(17)
N1B 0.0540(19) 0.0376(17) 0.0445(19) 0.0072(15) 0.0196(16) 0.0010(14)
C2B 0.053(2) 0.042(2) 0.036(2) 0.0007(17) 0.0093(18) 0.0007(17)
C6A 0.044(2) 0.073(3) 0.031(2) 0.006(2) 0.0098(17) 0.000(2)
N2A 0.053(2) 0.0379(18) 0.054(2) -0.0125(16) 0.0073(17) -0.0046(15)
C17A 0.0301(19) 0.043(2) 0.039(2) 0.0091(17) 0.0089(16) -0.0022(15)
C16A 0.050(2) 0.049(2) 0.046(2) 0.0028(18) 0.0199(19) -0.0051(18)
C1A 0.032(2) 0.055(2) 0.039(2) 0.0086(18) 0.0085(16) 0.0088(17)
C1B 0.0309(19) 0.043(2) 0.033(2) -0.0009(16) 0.0111(16) 0.0057(15)
C36B 0.045(2) 0.032(2) 0.062(3) -0.0057(18) 0.027(2) 0.0014(17)
C7B 0.061(3) 0.054(2) 0.038(2) 0.0161(19) 0.019(2) 0.010(2)
C12B 0.054(2) 0.039(2) 0.044(2) -0.0081(17) 0.0206(18) 0.0023(18)
C15B 0.073(3) 0.076(3) 0.052(3) 0.010(2) 0.034(2) 0.004(2)
C13A 0.046(2) 0.056(3) 0.067(3) 0.029(2) 0.004(2) -0.0129(19)
C7A 0.061(3) 0.093(4) 0.033(2) -0.010(2) 0.014(2) -0.010(2)
C3B 0.071(3) 0.049(2) 0.044(2) -0.011(2) 0.014(2) -0.004(2)
C17B 0.036(2) 0.045(2) 0.034(2) -0.0020(16) 0.0116(16) 0.0039(16)
C12A 0.038(2) 0.040(2) 0.042(2) 0.0114(17) 0.0024(17) -0.0036(16)
C4B 0.069(3) 0.066(3) 0.036(2) -0.012(2) 0.000(2) 0.002(2)
C5B 0.070(3) 0.060(3) 0.033(2) 0.0037(19) 0.009(2) 0.011(2)
C16B 0.056(2) 0.051(2) 0.045(2) 0.0055(19) 0.021(2) 0.0070(19)
C11A 0.052(3) 0.035(2) 0.062(3) 0.003(2) 0.001(2) -0.0076(18)
C14B 0.093(4) 0.083(3) 0.064(3) -0.004(3) 0.053(3) 0.016(3)
C2A 0.059(3) 0.052(2) 0.049(2) 0.0150(19) 0.024(2) 0.0097(19)
C5A 0.065(3) 0.102(4) 0.041(3) 0.012(3) 0.017(2) 0.001(3)
C10B 0.088(3) 0.032(2) 0.085(3) -0.003(2) 0.042(3) -0.008(2)
C15A 0.052(3) 0.076(3) 0.050(3) 0.009(2) 0.022(2) -0.005(2)
C4A 0.071(3) 0.102(4) 0.053(3) 0.039(3) 0.024(2) 0.007(3)
C10A 0.085(3) 0.053(3) 0.080(3) -0.025(2) 0.021(3) -0.003(2)
C14A 0.051(3) 0.096(4) 0.059(3) 0.033(3) 0.016(2) -0.012(2)
C11B 0.062(3) 0.034(2) 0.063(3) -0.0121(19) 0.020(2) 0.0054(18)
C9B 0.082(3) 0.035(2) 0.080(3) 0.019(2) 0.024(3) 0.005(2)
C8B 0.086(3) 0.051(3) 0.057(3) 0.016(2) 0.026(2) -0.009(2)
C13B 0.085(3) 0.060(3) 0.061(3) -0.011(2) 0.034(3) 0.016(2)
C3A 0.072(3) 0.059(3) 0.079(3) 0.028(2) 0.029(3) 0.012(2)
C9A 0.095(4) 0.066(3) 0.077(4) -0.034(3) 0.010(3) -0.011(3)
C8A 0.117(4) 0.099(4) 0.087(4) -0.059(3) 0.056(3) -0.042(3)
C35B 0.043(2) 0.034(2) 0.049(2) 0.0040(17) 0.0104(19) -0.0040(16)
C36A 0.040(2) 0.037(2) 0.064(3) 0.0012(19) 0.0226(19) -0.0036(17)
N6B 0.078(3) 0.0353(19) 0.148(4) 0.002(2) 0.079(3) -0.0005(17)
N6A 0.088(3) 0.042(2) 0.160(4) -0.026(2) 0.086(3) -0.0151(19)
N5B 0.045(2) 0.066(2) 0.049(2) 0.0005(16) 0.0149(16) -0.0087(16)
N5A 0.050(2) 0.056(2) 0.058(2) -0.0005(17) 0.0184(18) 0.0058(16)
C35A 0.039(2) 0.033(2) 0.055(2) -0.0039(17) 0.0097(19) -0.0003(16)
 
_geom_special_details
;
 All esds (except the esd in the dihedral angle between two l.s. planes)
 are estimated using the full covariance matrix.  The cell esds are taken
 into account individually in the estimation of esds in distances, angles
 and torsion angles; correlations between esds in cell parameters are only
 used when they are defined by crystal symmetry.  An approximate (isotropic)
 treatment of cell esds is used for estimating esds involving l.s. planes.
;
 
loop_
 _geom_bond_atom_site_label_1
 _geom_bond_atom_site_label_2
 _geom_bond_distance
 _geom_bond_site_symmetry_2
 _geom_bond_publ_flag
Co1 O1B 2.056(2) . ?
Co1 N7B 2.060(3) . ?
Co1 N7A 2.080(3) . ?
Co1 O1A 2.094(2) . ?
Co1 O2A 2.124(2) . ?
Co1 O2B 2.172(2) . ?
Cu1B O2B 1.949(2) . ?
Cu1B O1B 1.951(2) . ?
Cu1B N1B 1.976(3) . ?
Cu1B N2B 1.978(3) . ?
Cu1B N5B 2.296(3) 2 ?
Cu1A O2A 1.949(2) . ?
Cu1A O1A 1.956(2) . ?
Cu1A N1A 1.977(3) . ?
Cu1A N2A 1.980(3) . ?
Cu1A N5A 2.379(3) 2_655 ?
N1A C7A 1.285(5) . ?
N1A C8A 1.504(5) . ?
O2A C17A 1.319(3) . ?
O1A C1A 1.334(4) . ?
O1B C1B 1.326(4) . ?
O2B C17B 1.327(3) . ?
N2B C11B 1.276(4) . ?
N2B C10B 1.465(4) . ?
N7B C36B 1.140(4) . ?
N7A C36A 1.135(4) . ?
C6B C5B 1.404(5) . ?
C6B C1B 1.411(4) . ?
C6B C7B 1.433(5) . ?
N1B C7B 1.288(4) . ?
N1B C8B 1.466(4) . ?
C2B C3B 1.370(5) . ?
C2B C1B 1.390(4) . ?
C2B H2B 0.9300 . ?
C6A C5A 1.400(5) . ?
C6A C1A 1.402(5) . ?
C6A C7A 1.439(5) . ?
N2A C11A 1.283(4) . ?
N2A C10A 1.468(5) . ?
C17A C16A 1.393(5) . ?
C17A C12A 1.412(5) . ?
C16A C15A 1.374(5) . ?
C16A H16A 0.9300 . ?
C1A C2A 1.388(5) . ?
C36B N6B 1.294(5) . ?
C7B H7B 0.9300 . ?
C12B C17B 1.402(5) . ?
C12B C13B 1.411(5) . ?
C12B C11B 1.448(5) . ?
C15B C14B 1.381(6) . ?
C15B C16B 1.381(5) . ?
C15B H15B 0.9300 . ?
C13A C14A 1.363(6) . ?
C13A C12A 1.403(5) . ?
C13A H13A 0.9300 . ?
C7A H7A 0.9300 . ?
C3B C4B 1.378(5) . ?
C3B H3B 0.9300 . ?
C17B C16B 1.393(5) . ?
C12A C11A 1.438(5) . ?
C4B C5B 1.359(5) . ?
C4B H4B 0.9300 . ?
C5B H5B 0.9300 . ?
C16B H16B 0.9300 . ?
C11A H11A 0.9300 . ?
C14B C13B 1.370(5) . ?
C14B H14B 0.9300 . ?
C2A C3A 1.385(5) . ?
C2A H2A 0.9300 . ?
C5A C4A 1.354(6) . ?
C5A H5A 0.9300 . ?
C10B C9B 1.507(5) . ?
C10B H10D 0.9700 . ?
C10B H10C 0.9700 . ?
C15A C14A 1.371(6) . ?
C15A H15A 0.9300 . ?
C4A C3A 1.377(6) . ?
C4A H4A 0.9300 . ?
C10A C9A 1.486(6) . ?
C10A H10A 0.9700 . ?
C10A H10B 0.9700 . ?
C14A H14A 0.9300 . ?
C11B H11B 0.9300 . ?
C9B C8B 1.502(5) . ?
C9B H9C 0.9700 . ?
C9B H9D 0.9700 . ?
C8B H8C 0.9700 . ?
C8B H8D 0.9700 . ?
C13B H13B 0.9300 . ?
C3A H3A 0.9300 . ?
C9A C8A 1.477(6) . ?
C9A H9A 0.9700 . ?
C9A H9B 0.9700 . ?
C8A H8A 0.9700 . ?
C8A H8B 0.9700 . ?
C35B N5B 1.141(4) . ?
C35B N6B 1.301(5) . ?
C36A N6A 1.301(5) . ?
N6A C35A 1.295(5) . ?
N5B Cu1B 2.296(3) 2_545 ?
N5A C35A 1.135(4) . ?
N5A Cu1A 2.379(3) 2_645 ?
 
loop_
 _geom_angle_atom_site_label_1
 _geom_angle_atom_site_label_2
 _geom_angle_atom_site_label_3
 _geom_angle
 _geom_angle_site_symmetry_1
 _geom_angle_site_symmetry_3
 _geom_angle_publ_flag
O1B Co1 N7B 98.81(10) . . ?
O1B Co1 N7A 98.31(10) . . ?
N7B Co1 N7A 90.29(12) . . ?
O1B Co1 O1A 155.09(9) . . ?
N7B Co1 O1A 98.89(10) . . ?
N7A Co1 O1A 98.99(10) . . ?
O1B Co1 O2A 88.37(9) . . ?
N7B Co1 O2A 169.65(10) . . ?
N7A Co1 O2A 96.07(10) . . ?
O1A Co1 O2A 72.09(8) . . ?
O1B Co1 O2B 74.39(8) . . ?
N7B Co1 O2B 95.23(10) . . ?
N7A Co1 O2B 171.42(10) . . ?
O1A Co1 O2B 86.67(9) . . ?
O2A Co1 O2B 79.45(9) . . ?
O2B Cu1B O1B 81.97(9) . . ?
O2B Cu1B N1B 167.71(10) . . ?
O1B Cu1B N1B 90.00(10) . . ?
O2B Cu1B N2B 90.21(11) . . ?
O1B Cu1B N2B 169.39(11) . . ?
N1B Cu1B N2B 96.48(12) . . ?
O2B Cu1B N5B 92.47(10) . 2 ?
O1B Cu1B N5B 94.16(10) . 2 ?
N1B Cu1B N5B 97.40(12) . 2 ?
N2B Cu1B N5B 93.33(11) . 2 ?
O2A Cu1A O1A 78.91(9) . . ?
O2A Cu1A N1A 167.70(11) . . ?
O1A Cu1A N1A 92.04(12) . . ?
O2A Cu1A N2A 90.31(11) . . ?
O1A Cu1A N2A 167.29(11) . . ?
N1A Cu1A N2A 97.56(14) . . ?
O2A Cu1A N5A 94.33(10) . 2_655 ?
O1A Cu1A N5A 99.26(10) . 2_655 ?
N1A Cu1A N5A 95.36(12) . 2_655 ?
N2A Cu1A N5A 88.15(12) . 2_655 ?
C7A N1A C8A 116.0(3) . . ?
C7A N1A Cu1A 122.9(3) . . ?
C8A N1A Cu1A 121.1(3) . . ?
C17A O2A Cu1A 128.1(2) . . ?
C17A O2A Co1 134.8(2) . . ?
Cu1A O2A Co1 96.12(9) . . ?
C1A O1A Cu1A 128.8(2) . . ?
C1A O1A Co1 128.9(2) . . ?
Cu1A O1A Co1 96.90(9) . . ?
C1B O1B Cu1B 123.09(19) . . ?
C1B O1B Co1 134.3(2) . . ?
Cu1B O1B Co1 100.85(9) . . ?
C17B O2B Cu1B 122.9(2) . . ?
C17B O2B Co1 137.2(2) . . ?
Cu1B O2B Co1 96.96(9) . . ?
C11B N2B C10B 116.4(3) . . ?
C11B N2B Cu1B 120.5(2) . . ?
C10B N2B Cu1B 122.8(2) . . ?
C36B N7B Co1 167.0(3) . . ?
C36A N7A Co1 174.4(3) . . ?
C5B C6B C1B 119.4(3) . . ?
C5B C6B C7B 117.9(3) . . ?
C1B C6B C7B 122.6(3) . . ?
C7B N1B C8B 118.3(3) . . ?
C7B N1B Cu1B 120.1(2) . . ?
C8B N1B Cu1B 121.3(2) . . ?
C3B C2B C1B 121.1(3) . . ?
C3B C2B H2B 119.5 . . ?
C1B C2B H2B 119.5 . . ?
C5A C6A C1A 119.2(4) . . ?
C5A C6A C7A 117.4(4) . . ?
C1A C6A C7A 123.4(3) . . ?
C11A N2A C10A 115.1(3) . . ?
C11A N2A Cu1A 122.6(3) . . ?
C10A N2A Cu1A 121.9(3) . . ?
O2A C17A C16A 120.6(3) . . ?
O2A C17A C12A 121.1(3) . . ?
C16A C17A C12A 118.3(3) . . ?
C15A C16A C17A 120.3(4) . . ?
C15A C16A H16A 119.8 . . ?
C17A C16A H16A 119.8 . . ?
O1A C1A C2A 119.9(3) . . ?
O1A C1A C6A 121.7(3) . . ?
C2A C1A C6A 118.4(3) . . ?
O1B C1B C2B 121.1(3) . . ?
O1B C1B C6B 121.0(3) . . ?
C2B C1B C6B 117.9(3) . . ?
N7B C36B N6B 172.9(4) . . ?
N1B C7B C6B 128.1(3) . . ?
N1B C7B H7B 116.0 . . ?
C6B C7B H7B 116.0 . . ?
C17B C12B C13B 119.6(3) . . ?
C17B C12B C11B 123.3(3) . . ?
C13B C12B C11B 117.0(3) . . ?
C14B C15B C16B 120.7(4) . . ?
C14B C15B H15B 119.6 . . ?
C16B C15B H15B 119.6 . . ?
C14A C13A C12A 121.2(4) . . ?
C14A C13A H13A 119.4 . . ?
C12A C13A H13A 119.4 . . ?
N1A C7A C6A 129.5(4) . . ?
N1A C7A H7A 115.3 . . ?
C6A C7A H7A 115.3 . . ?
C2B C3B C4B 121.3(4) . . ?
C2B C3B H3B 119.3 . . ?
C4B C3B H3B 119.3 . . ?
O2B C17B C16B 120.8(3) . . ?
O2B C17B C12B 120.9(3) . . ?
C16B C17B C12B 118.3(3) . . ?
C13A C12A C17A 119.2(3) . . ?
C13A C12A C11A 117.7(3) . . ?
C17A C12A C11A 123.0(3) . . ?
C5B C4B C3B 119.0(4) . . ?
C5B C4B H4B 120.5 . . ?
C3B C4B H4B 120.5 . . ?
C4B C5B C6B 121.3(3) . . ?
C4B C5B H5B 119.3 . . ?
C6B C5B H5B 119.3 . . ?
C15B C16B C17B 121.1(4) . . ?
C15B C16B H16B 119.5 . . ?
C17B C16B H16B 119.5 . . ?
N2A C11A C12A 127.9(3) . . ?
N2A C11A H11A 116.0 . . ?
C12A C11A H11A 116.0 . . ?
C13B C14B C15B 119.4(4) . . ?
C13B C14B H14B 120.3 . . ?
C15B C14B H14B 120.3 . . ?
C3A C2A C1A 120.6(4) . . ?
C3A C2A H2A 119.7 . . ?
C1A C2A H2A 119.7 . . ?
C4A C5A C6A 121.7(4) . . ?
C4A C5A H5A 119.2 . . ?
C6A C5A H5A 119.2 . . ?
N2B C10B C9B 113.1(3) . . ?
N2B C10B H10D 109.0 . . ?
C9B C10B H10D 109.0 . . ?
N2B C10B H10C 109.0 . . ?
C9B C10B H10C 109.0 . . ?
H10D C10B H10C 107.8 . . ?
C14A C15A C16A 121.8(4) . . ?
C14A C15A H15A 119.1 . . ?
C16A C15A H15A 119.1 . . ?
C5A C4A C3A 119.2(4) . . ?
C5A C4A H4A 120.4 . . ?
C3A C4A H4A 120.4 . . ?
N2A C10A C9A 111.7(4) . . ?
N2A C10A H10A 109.3 . . ?
C9A C10A H10A 109.3 . . ?
N2A C10A H10B 109.3 . . ?
C9A C10A H10B 109.3 . . ?
H10A C10A H10B 107.9 . . ?
C13A C14A C15A 119.2(4) . . ?
C13A C14A H14A 120.4 . . ?
C15A C14A H14A 120.4 . . ?
N2B C11B C12B 127.4(3) . . ?
N2B C11B H11B 116.3 . . ?
C12B C11B H11B 116.3 . . ?
C8B C9B C10B 113.4(3) . . ?
C8B C9B H9C 108.9 . . ?
C10B C9B H9C 108.9 . . ?
C8B C9B H9D 108.9 . . ?
C10B C9B H9D 108.9 . . ?
H9C C9B H9D 107.7 . . ?
N1B C8B C9B 112.8(3) . . ?
N1B C8B H8C 109.0 . . ?
C9B C8B H8C 109.0 . . ?
N1B C8B H8D 109.0 . . ?
C9B C8B H8D 109.0 . . ?
H8C C8B H8D 107.8 . . ?
C14B C13B C12B 120.8(4) . . ?
C14B C13B H13B 119.6 . . ?
C12B C13B H13B 119.6 . . ?
C4A C3A C2A 120.8(4) . . ?
C4A C3A H3A 119.6 . . ?
C2A C3A H3A 119.6 . . ?
C8A C9A C10A 114.1(4) . . ?
C8A C9A H9A 108.7 . . ?
C10A C9A H9A 108.7 . . ?
C8A C9A H9B 108.7 . . ?
C10A C9A H9B 108.7 . . ?
H9A C9A H9B 107.6 . . ?
C9A C8A N1A 114.1(4) . . ?
C9A C8A H8A 108.7 . . ?
N1A C8A H8A 108.7 . . ?
C9A C8A H8B 108.7 . . ?
N1A C8A H8B 108.7 . . ?
H8A C8A H8B 107.6 . . ?
N5B C35B N6B 173.0(4) . . ?
N7A C36A N6A 173.0(4) . . ?
C36B N6B C35B 123.2(3) . . ?
C35A N6A C36A 124.0(3) . . ?
C35B N5B Cu1B 140.8(3) . 2_545 ?
C35A N5A Cu1A 130.6(3) . 2_645 ?
N5A C35A N6A 172.9(4) . . ?
 
_diffrn_measured_fraction_theta_max    0.980
_diffrn_reflns_theta_full              25.50
_diffrn_measured_fraction_theta_full   0.980
_refine_diff_density_max    0.317
_refine_diff_density_min   -0.389
_refine_diff_density_rms    0.083

 
data_2b
 
_audit_creation_method            SHELXL-97
_chemical_name_systematic
;
 ?
;
_chemical_name_common             ?
_chemical_melting_point           ?
_chemical_formula_moiety          ?
_chemical_formula_sum
 'C38 H32 Co Cu2 N10 O4'
_chemical_formula_weight          878.77
 
loop_
 _atom_type_symbol
 _atom_type_description
 _atom_type_scat_dispersion_real
 _atom_type_scat_dispersion_imag
 _atom_type_scat_source
 'C'  'C'   0.0033   0.0016
 'International Tables Vol C Tables 4.2.6.8 and 6.1.1.4'
 'H'  'H'   0.0000   0.0000
 'International Tables Vol C Tables 4.2.6.8 and 6.1.1.4'
 'Co'  'Co'   0.3494   0.9721
 'International Tables Vol C Tables 4.2.6.8 and 6.1.1.4'
 'Cu'  'Cu'   0.3201   1.2651
 'International Tables Vol C Tables 4.2.6.8 and 6.1.1.4'
 'N'  'N'   0.0061   0.0033
 'International Tables Vol C Tables 4.2.6.8 and 6.1.1.4'
 'O'  'O'   0.0106   0.0060
 'International Tables Vol C Tables 4.2.6.8 and 6.1.1.4'
 
_symmetry_cell_setting            'Trigonal'
_symmetry_space_group_name_H-M    'P 32 2 1'
 
loop_
 _symmetry_equiv_pos_as_xyz
 'x, y, z'
 '-y, x-y, z+2/3'
 '-x+y, -x, z+1/3'
 'y, x, -z'
 '-x, -x+y, -z+2/3'
 'x-y, -y, -z+1/3'
 
_cell_length_a                    11.447(5)
_cell_length_b                    11.447(5)
_cell_length_c                    24.454(5)
_cell_angle_alpha                 90.00
_cell_angle_beta                  90.00
_cell_angle_gamma                 120.00
_cell_volume                      2775(3)
_cell_formula_units_Z             3
_cell_measurement_temperature     293(2)
_cell_measurement_reflns_used     ?
_cell_measurement_theta_min       2.05
_cell_measurement_theta_max       26.41
 
_exptl_crystal_description        rectangular
_exptl_crystal_colour             green
_exptl_crystal_size_max           0.12
_exptl_crystal_size_mid           0.08
_exptl_crystal_size_min           0.08
_exptl_crystal_density_meas       ?
_exptl_crystal_density_diffrn     1.578
_exptl_crystal_density_method     'not measured'
_exptl_crystal_F_000              1341
_exptl_absorpt_coefficient_mu     1.638
_exptl_absorpt_correction_type    empirical
_exptl_absorpt_correction_T_min   0.8277
_exptl_absorpt_correction_T_max   0.8801
_exptl_absorpt_process_details    sadabs
 
_exptl_special_details
;
 ?
;
 
_diffrn_ambient_temperature       293(2)
_diffrn_radiation_wavelength      0.71073
_diffrn_radiation_type            MoK\a
_diffrn_radiation_source          'fine-focus sealed tube'
_diffrn_radiation_monochromator   graphite
_diffrn_measurement_device_type   'CCD area detector'
_diffrn_measurement_method        'phi and omega scans'
_diffrn_detector_area_resol_mean  ?
_diffrn_standards_number          ?
_diffrn_standards_interval_count  ?
_diffrn_standards_interval_time   ?
_diffrn_standards_decay_%         ?
_diffrn_reflns_number             34269
_diffrn_reflns_av_R_equivalents   0.0772
_diffrn_reflns_av_sigmaI/netI     0.0435
_diffrn_reflns_limit_h_min        -14
_diffrn_reflns_limit_h_max        13
_diffrn_reflns_limit_k_min        -14
_diffrn_reflns_limit_k_max        14
_diffrn_reflns_limit_l_min        -29
_diffrn_reflns_limit_l_max        30
_diffrn_reflns_theta_min          2.05
_diffrn_reflns_theta_max          26.41
_reflns_number_total              3798
_reflns_number_gt                 3096
_reflns_threshold_expression      >2sigma(I)

_computing_data_collection        'Bruker SMART APEX2' 
_computing_cell_refinement        'Bruker SMART APEX2' 
_computing_data_reduction         'Bruker SAINT'
_computing_structure_solution     'SHELXS-97 (Sheldrick, 1990)' 
_computing_structure_refinement   'SHELXL-97 (Sheldrick, 1997)'
_computing_molecular_graphics     'Ortep-3 for Windows (Farrugia, 1997)'
_computing_publication_material   'WINGX V1.80.03'
 
_refine_special_details
;
 Refinement of F^2^ against ALL reflections.  The weighted R-factor wR and
 goodness of fit S are based on F^2^, conventional R-factors R are based
 on F, with F set to zero for negative F^2^. The threshold expression of
 F^2^ > 2sigma(F^2^) is used only for calculating R-factors(gt) etc. and is
 not relevant to the choice of reflections for refinement.  R-factors based
 on F^2^ are statistically about twice as large as those based on F, and R-
 factors based on ALL data will be even larger.
;
 
_refine_ls_structure_factor_coef  Fsqd
_refine_ls_matrix_type            full
_refine_ls_weighting_scheme       calc
_refine_ls_weighting_details
 'calc w=1/[\s^2^(Fo^2^)+(0.0501P)^2^+2.3714P] where P=(Fo^2^+2Fc^2^)/3'
_atom_sites_solution_primary      direct
_atom_sites_solution_secondary    difmap
_atom_sites_solution_hydrogens    geom
_refine_ls_hydrogen_treatment     noref
_refine_ls_extinction_method      none
_refine_ls_extinction_coef        ?
_refine_ls_abs_structure_details
 'Flack H D (1983), Acta Cryst. A39, 876-881'
_refine_ls_abs_structure_Flack    0.48(3)
_refine_ls_number_reflns          3798
_refine_ls_number_parameters      260
_refine_ls_number_restraints      9
_refine_ls_R_factor_all           0.0614
_refine_ls_R_factor_gt            0.0446
_refine_ls_wR_factor_ref          0.1117
_refine_ls_wR_factor_gt           0.1026
_refine_ls_goodness_of_fit_ref    1.035
_refine_ls_restrained_S_all       1.059
_refine_ls_shift/su_max           0.001
_refine_ls_shift/su_mean          0.000
 
loop_
 _atom_site_label
 _atom_site_type_symbol
 _atom_site_fract_x
 _atom_site_fract_y
 _atom_site_fract_z
 _atom_site_U_iso_or_equiv
 _atom_site_adp_type
 _atom_site_occupancy
 _atom_site_symmetry_multiplicity
 _atom_site_calc_flag
 _atom_site_refinement_flags
 _atom_site_disorder_assembly
 _atom_site_disorder_group
Cu1 Cu 0.05697(8) 0.31595(6) 0.25467(2) 0.0597(2) Uani 1 1 d . . .
Co1 Co 0.0000 0.49052(7) 0.3333 0.0352(2) Uani 1 2 d S . .
O1 O 0.1110(3) 0.5029(3) 0.26531(12) 0.0447(8) Uani 1 1 d . B .
O2 O -0.1007(4) 0.2984(3) 0.29180(13) 0.0583(10) Uani 1 1 d . B .
N1 N 0.2410(6) 0.3654(5) 0.23155(18) 0.0628(12) Uani 1 1 d D B .
N7 N -0.1234(5) 0.5569(4) 0.30008(17) 0.0544(11) Uani 1 1 d . B .
C1 C 0.1991(5) 0.6035(4) 0.23366(17) 0.0409(10) Uani 1 1 d . . .
C2 C 0.1962(5) 0.7224(5) 0.2303(2) 0.0515(13) Uani 1 1 d . B .
H2 H 0.1339 0.7332 0.2509 0.062 Uiso 1 1 calc R . .
C3 C 0.2849(6) 0.8251(6) 0.1967(2) 0.0661(16) Uani 1 1 d . . .
H3 H 0.2816 0.9046 0.1951 0.079 Uiso 1 1 calc R B .
C4 C 0.3779(7) 0.8135(7) 0.1655(2) 0.0780(19) Uani 1 1 d . B .
H4 H 0.4350 0.8829 0.1422 0.094 Uiso 1 1 calc R . .
C5 C 0.3855(5) 0.6998(7) 0.1691(2) 0.0651(16) Uani 1 1 d . . .
H5 H 0.4503 0.6925 0.1487 0.078 Uiso 1 1 calc R B .
C6 C 0.2971(5) 0.5917(5) 0.20302(19) 0.0488(11) Uani 1 1 d . B .
C7 C 0.3187(6) 0.4787(6) 0.2077(2) 0.0623(15) Uani 1 1 d . . .
H7 H 0.3969 0.4883 0.1918 0.075 Uiso 1 1 calc R B .
C8 C 0.2988(8) 0.2769(7) 0.2363(3) 0.100(3) Uani 1 1 d D . .
H8A H 0.3312 0.2807 0.2732 0.120 Uiso 1 1 calc R A 1
H8B H 0.3746 0.3070 0.2115 0.120 Uiso 1 1 calc R A 1
C9A C 0.1934(9) 0.1347(8) 0.2227(6) 0.163(5) Uani 0.757(18) 1 d PD B 1
H9A1 H 0.1556 0.1359 0.1873 0.195 Uiso 0.757(18) 1 calc PR B 1
H9A2 H 0.2384 0.0824 0.2186 0.195 Uiso 0.757(18) 1 calc PR B 1
C10A C 0.0828(12) 0.0639(10) 0.2604(6) 0.111(6) Uani 0.757(18) 1 d PD B 1
H10A H 0.1177 0.0728 0.2972 0.133 Uiso 0.757(18) 1 calc PR B 1
H10B H 0.0338 -0.0313 0.2511 0.133 Uiso 0.757(18) 1 calc PR B 1
N2A N -0.0120(8) 0.1206(6) 0.2580(3) 0.130(3) Uani 0.757(18) 1 d PD B 1
C11A C -0.1406(12) 0.0345(8) 0.2642(5) 0.115(6) Uani 0.757(18) 1 d PD B 1
H11A H -0.1665 -0.0560 0.2601 0.138 Uiso 0.757(18) 1 calc PR B 1
C9B C 0.1934(9) 0.1347(8) 0.2227(6) 0.163(5) Uani 0.243(18) 1 d PD B 2
H9B1 H 0.2071 0.0804 0.2496 0.195 Uiso 0.243(18) 1 calc PR B 2
H9B2 H 0.2233 0.1169 0.1882 0.195 Uiso 0.243(18) 1 calc PR B 2
C10B C 0.0364(13) 0.064(2) 0.2166(9) 0.069(9) Uiso 0.243(18) 1 d PD B 2
H10C H 0.0127 0.0801 0.1804 0.083 Uiso 0.243(18) 1 calc PR B 2
H10D H -0.0039 -0.0325 0.2219 0.083 Uiso 0.243(18) 1 calc PR B 2
N2B N -0.0120(8) 0.1206(6) 0.2580(3) 0.130(3) Uani 0.243(18) 1 d PD B 2
C11B C -0.135(3) 0.061(6) 0.242(3) 0.14(2) Uiso 0.243(18) 1 d PD B 2
H11B H -0.1574 0.0168 0.2082 0.169 Uiso 0.243(18) 1 calc PR B 2
C12 C -0.2477(9) 0.0629(6) 0.2767(3) 0.094(3) Uani 1 1 d . . .
C13 C -0.3805(12) -0.0465(8) 0.2802(3) 0.126(4) Uani 1 1 d . B .
H13 H -0.3983 -0.1312 0.2686 0.152 Uiso 1 1 calc R . .
C14 C -0.4829(11) -0.0321(9) 0.2999(4) 0.130(4) Uani 1 1 d . . .
H14 H -0.5693 -0.1066 0.3021 0.156 Uiso 1 1 calc R B .
C15 C -0.4597(7) 0.0934(8) 0.3169(3) 0.099(3) Uani 1 1 d . B .
H15 H -0.5299 0.1033 0.3307 0.119 Uiso 1 1 calc R . .
C16 C -0.3302(6) 0.2045(6) 0.3130(2) 0.0718(18) Uani 1 1 d . . .
H16 H -0.3153 0.2888 0.3238 0.086 Uiso 1 1 calc R B .
C17 C -0.2222(7) 0.1923(5) 0.2933(2) 0.0665(17) Uani 1 1 d . B .
N6 N -0.2259(8) 0.6839(7) 0.2647(2) 0.102(2) Uani 1 1 d . B .
C36 C -0.1739(6) 0.6107(6) 0.2809(2) 0.0567(13) Uani 1 1 d . . .
C35 C -0.2734(5) 0.6757(5) 0.2163(2) 0.0560(13) Uani 1 1 d . . .
N5 N -0.3148(7) 0.6839(6) 0.1756(2) 0.094(2) Uani 1 1 d . . .
 
loop_
 _atom_site_aniso_label
 _atom_site_aniso_U_11
 _atom_site_aniso_U_22
 _atom_site_aniso_U_33
 _atom_site_aniso_U_23
 _atom_site_aniso_U_13
 _atom_site_aniso_U_12
Cu1 0.0856(5) 0.0347(3) 0.0518(3) 0.0011(3) 0.0294(3) 0.0249(3)
Co1 0.0437(5) 0.0330(3) 0.0324(4) 0.00108(17) 0.0022(3) 0.0218(2)
O1 0.060(2) 0.0354(16) 0.0357(16) 0.0019(13) 0.0128(15) 0.0215(15)
O2 0.068(2) 0.0332(17) 0.0543(19) -0.0061(14) 0.0213(19) 0.0112(17)
N1 0.098(4) 0.064(3) 0.047(2) 0.002(2) 0.014(2) 0.056(3)
N7 0.058(3) 0.053(3) 0.059(2) 0.011(2) -0.001(2) 0.033(2)
C1 0.043(3) 0.037(2) 0.032(2) -0.0006(18) -0.0078(19) 0.012(2)
C2 0.047(3) 0.047(3) 0.054(3) 0.011(2) 0.001(2) 0.019(2)
C3 0.061(3) 0.048(3) 0.075(4) 0.022(3) 0.004(3) 0.016(3)
C4 0.070(4) 0.063(4) 0.071(4) 0.031(3) 0.010(3) 0.010(3)
C5 0.049(3) 0.076(4) 0.053(3) 0.005(3) 0.015(2) 0.018(3)
C6 0.052(3) 0.050(3) 0.037(2) -0.002(2) 0.002(2) 0.020(2)
C7 0.063(3) 0.075(4) 0.047(3) -0.009(3) 0.008(3) 0.033(3)
C8 0.137(7) 0.093(6) 0.104(5) 0.002(4) 0.035(5) 0.083(6)
C9A 0.180(13) 0.110(8) 0.242(14) -0.053(9) -0.032(11) 0.106(9)
C10A 0.154(12) 0.053(6) 0.152(12) -0.002(6) 0.056(9) 0.071(7)
N2A 0.172(8) 0.049(3) 0.153(6) 0.000(4) 0.105(6) 0.044(4)
C11A 0.173(13) 0.021(4) 0.110(8) -0.004(4) 0.097(8) 0.016(5)
C9B 0.180(13) 0.110(8) 0.242(14) -0.053(9) -0.032(11) 0.106(9)
N2B 0.172(8) 0.049(3) 0.153(6) 0.000(4) 0.105(6) 0.044(4)
C12 0.127(7) 0.036(3) 0.060(4) -0.002(3) 0.027(4) -0.005(4)
C13 0.151(9) 0.050(4) 0.089(6) -0.009(4) 0.007(6) -0.017(5)
C14 0.115(7) 0.070(6) 0.090(6) 0.013(5) -0.027(5) -0.041(5)
C15 0.065(4) 0.101(6) 0.069(4) 0.019(4) -0.008(3) -0.005(4)
C16 0.063(4) 0.062(4) 0.052(3) 0.000(3) -0.005(3) 0.002(3)
C17 0.078(4) 0.044(3) 0.041(3) -0.005(2) 0.009(3) 0.003(3)
N6 0.160(6) 0.137(6) 0.076(3) -0.016(4) -0.032(4) 0.124(5)
C36 0.072(4) 0.062(3) 0.048(3) 0.007(3) 0.002(3) 0.043(3)
C35 0.061(3) 0.057(3) 0.062(3) -0.005(3) -0.013(3) 0.040(3)
N5 0.134(6) 0.114(5) 0.074(3) -0.030(3) -0.048(4) 0.092(4)
 
_geom_special_details
;
 All esds (except the esd in the dihedral angle between two l.s. planes)
 are estimated using the full covariance matrix.  The cell esds are taken
 into account individually in the estimation of esds in distances, angles
 and torsion angles; correlations between esds in cell parameters are only
 used when they are defined by crystal symmetry.  An approximate (isotropic)
 treatment of cell esds is used for estimating esds involving l.s. planes.
;
 
loop_
 _geom_bond_atom_site_label_1
 _geom_bond_atom_site_label_2
 _geom_bond_distance
 _geom_bond_site_symmetry_2
 _geom_bond_publ_flag
Cu1 O1 1.925(3) . ?
Cu1 O2 1.938(4) . ?
Cu1 N2B 1.966(6) . ?
Cu1 N2A 1.966(6) . ?
Cu1 N1 1.971(5) . ?
Cu1 N5 2.456(6) 6_665 ?
Co1 O1 2.055(3) . ?
Co1 O1 2.055(3) 5 ?
Co1 N7 2.075(4) . ?
Co1 N7 2.075(4) 5 ?
Co1 O2 2.159(3) . ?
Co1 O2 2.159(3) 5 ?
O1 C1 1.335(5) . ?
O2 C17 1.312(6) . ?
N1 C7 1.288(8) . ?
N1 C8 1.466(7) . ?
N7 C36 1.135(6) . ?
C1 C2 1.381(7) . ?
C1 C6 1.411(7) . ?
C2 C3 1.376(7) . ?
C2 H2 0.9300 . ?
C3 C4 1.370(9) . ?
C3 H3 0.9300 . ?
C4 C5 1.350(9) . ?
C4 H4 0.9300 . ?
C5 C6 1.411(7) . ?
C5 H5 0.9300 . ?
C6 C7 1.439(8) . ?
C7 H7 0.9300 . ?
C8 C9B 1.500(6) . ?
C8 C9A 1.500(6) . ?
C8 H8A 0.9700 . ?
C8 H8B 0.9700 . ?
C9A C10A 1.443(9) . ?
C9A H9A1 0.9700 . ?
C9A H9A2 0.9700 . ?
C10A N2A 1.519(8) . ?
C10A H10A 0.9700 . ?
C10A H10B 0.9700 . ?
N2A C11A 1.308(12) . ?
C11A C12 1.450(15) . ?
C11A H11A 0.9300 . ?
C9B C10B 1.566(10) . ?
C9B H9B1 0.9700 . ?
C9B H9B2 0.9700 . ?
C10B N2B 1.451(10) . ?
C10B H10C 0.9700 . ?
C10B H10D 0.9700 . ?
N2B C11B 1.29(2) . ?
C11B C12 1.56(6) . ?
C11B H11B 0.9300 . ?
C12 C13 1.408(12) . ?
C12 C17 1.419(9) . ?
C13 C14 1.352(15) . ?
C13 H13 0.9300 . ?
C14 C15 1.386(14) . ?
C14 H14 0.9300 . ?
C15 C16 1.392(9) . ?
C15 H15 0.9300 . ?
C16 C17 1.397(10) . ?
C16 H16 0.9300 . ?
N6 C35 1.285(7) . ?
N6 C36 1.309(7) . ?
C35 N5 1.126(7) . ?
N5 Cu1 2.456(6) 6_565 ?
 
loop_
 _geom_angle_atom_site_label_1
 _geom_angle_atom_site_label_2
 _geom_angle_atom_site_label_3
 _geom_angle
 _geom_angle_site_symmetry_1
 _geom_angle_site_symmetry_3
 _geom_angle_publ_flag
O1 Cu1 O2 79.47(13) . . ?
O1 Cu1 N2B 169.1(2) . . ?
O2 Cu1 N2B 92.3(2) . . ?
O1 Cu1 N2A 169.1(2) . . ?
O2 Cu1 N2A 92.3(2) . . ?
N2B Cu1 N2A 0.0(4) . . ?
O1 Cu1 N1 90.91(17) . . ?
O2 Cu1 N1 165.89(17) . . ?
N2B Cu1 N1 95.9(2) . . ?
N2A Cu1 N1 95.9(2) . . ?
O1 Cu1 N5 93.96(18) . 6_665 ?
O2 Cu1 N5 102.92(17) . 6_665 ?
N2B Cu1 N5 94.8(3) . 6_665 ?
N2A Cu1 N5 94.8(3) . 6_665 ?
N1 Cu1 N5 87.91(18) . 6_665 ?
O1 Co1 O1 152.17(18) . 5 ?
O1 Co1 N7 99.70(15) . . ?
O1 Co1 N7 99.87(15) 5 . ?
O1 Co1 N7 99.87(15) . 5 ?
O1 Co1 N7 99.70(15) 5 5 ?
N7 Co1 N7 90.1(3) . 5 ?
O1 Co1 O2 71.70(12) . . ?
O1 Co1 O2 87.27(13) 5 . ?
N7 Co1 O2 94.27(16) . . ?
N7 Co1 O2 171.04(16) 5 . ?
O1 Co1 O2 87.27(13) . 5 ?
O1 Co1 O2 71.70(12) 5 5 ?
N7 Co1 O2 171.04(16) . 5 ?
N7 Co1 O2 94.27(16) 5 5 ?
O2 Co1 O2 82.5(2) . 5 ?
C1 O1 Cu1 124.4(3) . . ?
C1 O1 Co1 134.7(3) . . ?
Cu1 O1 Co1 100.89(14) . . ?
C17 O2 Cu1 127.6(4) . . ?
C17 O2 Co1 135.1(4) . . ?
Cu1 O2 Co1 96.88(15) . . ?
C7 N1 C8 114.1(6) . . ?
C7 N1 Cu1 121.4(4) . . ?
C8 N1 Cu1 124.4(4) . . ?
C36 N7 Co1 170.0(5) . . ?
O1 C1 C2 120.4(5) . . ?
O1 C1 C6 121.3(4) . . ?
C2 C1 C6 118.4(4) . . ?
C3 C2 C1 120.4(6) . . ?
C3 C2 H2 119.8 . . ?
C1 C2 H2 119.8 . . ?
C4 C3 C2 121.8(6) . . ?
C4 C3 H3 119.1 . . ?
C2 C3 H3 119.1 . . ?
C5 C4 C3 119.1(5) . . ?
C5 C4 H4 120.5 . . ?
C3 C4 H4 120.5 . . ?
C4 C5 C6 121.3(6) . . ?
C4 C5 H5 119.4 . . ?
C6 C5 H5 119.4 . . ?
C1 C6 C5 119.0(5) . . ?
C1 C6 C7 123.2(5) . . ?
C5 C6 C7 117.7(5) . . ?
N1 C7 C6 126.7(5) . . ?
N1 C7 H7 116.6 . . ?
C6 C7 H7 116.6 . . ?
N1 C8 C9B 109.7(7) . . ?
N1 C8 C9A 109.7(7) . . ?
C9B C8 C9A 0.0(13) . . ?
N1 C8 H8A 109.7 . . ?
C9B C8 H8A 109.7 . . ?
C9A C8 H8A 109.7 . . ?
N1 C8 H8B 109.7 . . ?
C9B C8 H8B 109.7 . . ?
C9A C8 H8B 109.7 . . ?
H8A C8 H8B 108.2 . . ?
C10A C9A C8 118.1(10) . . ?
C10A C9A H9A1 107.8 . . ?
C8 C9A H9A1 107.8 . . ?
C10A C9A H9A2 107.8 . . ?
C8 C9A H9A2 107.8 . . ?
H9A1 C9A H9A2 107.1 . . ?
C9A C10A N2A 110.4(8) . . ?
C9A C10A H10A 109.6 . . ?
N2A C10A H10A 109.6 . . ?
C9A C10A H10B 109.6 . . ?
N2A C10A H10B 109.6 . . ?
H10A C10A H10B 108.1 . . ?
C11A N2A C10A 116.7(8) . . ?
C11A N2A Cu1 121.5(6) . . ?
C10A N2A Cu1 121.4(6) . . ?
N2A C11A C12 128.0(7) . . ?
N2A C11A H11A 116.0 . . ?
C12 C11A H11A 116.0 . . ?
C8 C9B C10B 132.4(10) . . ?
C8 C9B H9B1 104.1 . . ?
C10B C9B H9B1 104.2 . . ?
C8 C9B H9B2 104.2 . . ?
C10B C9B H9B2 104.2 . . ?
H9B1 C9B H9B2 105.5 . . ?
N2B C10B C9B 107.4(10) . . ?
N2B C10B H10C 110.2 . . ?
C9B C10B H10C 110.2 . . ?
N2B C10B H10D 110.2 . . ?
C9B C10B H10D 110.2 . . ?
H10C C10B H10D 108.5 . . ?
C11B N2B C10B 96(3) . . ?
C11B N2B Cu1 107(3) . . ?
C10B N2B Cu1 116.9(12) . . ?
N2B C11B C12 121(5) . . ?
N2B C11B H11B 119.4 . . ?
C12 C11B H11B 119.4 . . ?
C13 C12 C17 118.6(9) . . ?
C13 C12 C11A 118.2(8) . . ?
C17 C12 C11A 122.6(7) . . ?
C13 C12 C11B 123.7(19) . . ?
C17 C12 C11B 115(2) . . ?
C11A C12 C11B 23(2) . . ?
C14 C13 C12 122.0(9) . . ?
C14 C13 H13 119.0 . . ?
C12 C13 H13 119.0 . . ?
C13 C14 C15 120.2(8) . . ?
C13 C14 H14 119.9 . . ?
C15 C14 H14 119.9 . . ?
C14 C15 C16 119.4(9) . . ?
C14 C15 H15 120.3 . . ?
C16 C15 H15 120.3 . . ?
C15 C16 C17 121.6(7) . . ?
C15 C16 H16 119.2 . . ?
C17 C16 H16 119.2 . . ?
O2 C17 C16 120.0(6) . . ?
O2 C17 C12 121.8(7) . . ?
C16 C17 C12 118.2(6) . . ?
C35 N6 C36 123.0(5) . . ?
N7 C36 N6 172.1(6) . . ?
N5 C35 N6 170.8(6) . . ?
C35 N5 Cu1 137.1(5) . 6_565 ?
 
_diffrn_measured_fraction_theta_max    0.999
_diffrn_reflns_theta_full              26.41
_diffrn_measured_fraction_theta_full   0.999
_refine_diff_density_max    0.425
_refine_diff_density_min   -0.739
_refine_diff_density_rms    0.065
